# Supplementary material
Source: PubMed Central journal article supplement (PMC3697344)

**Induced Resistance to Methionyl-tRNA Synthetase Inhibitors in  
*Trypanosoma brucei* is Due to Overexpression of the Target**  
Supplementary Material

Ranae M. Ranade<sup>1</sup>, J. Robert Gillespie<sup>1</sup>, Sayaka Shibata<sup>2</sup>, Christophe L. M. J. Verlinde<sup>2</sup>,  
Erkang Fan<sup>2</sup>, Wim G. J. Hol<sup>2</sup>, and Frederick S. Buckner<sup>1</sup>

Department of Medicine<sup>1</sup> and Department of Biochemistry<sup>2</sup>, University of Washington,  
Seattle, Washington 98195

**Contents:**

1. Table S1.
2. Figure S1.

**Table S1.** PCR and sequencing primers for *T. brucei* methionyl-tRNA synthetase (Tb927.10.1500).

| Primer # | Sequence 5' to 3'       |
|----------|-------------------------|
| 1        | CAGGTGCACATATATCAACTCTC |
| 2        | GTCTCACTATTTGTCATGTTGC  |
| 3        | TGCGGTGATGTCCACTGTGAC   |
| 4        | GGAGTACCTATCTATCACTTCGT |
| 5        | TGGAGGGGCAGCAGATTCATC   |
| 6        | GCAACAGCTACCGCATCTTGTG  |
| 7        | ATGATTTTACGGCTGCTGTGGC  |
| 8        | AACCCCGGTTGCATAGTGCCA   |
| 9        | AGAAGATTGTCGCACATGGGTG  |
| 10       | CTGATTCCCGACATACAGAAAGC |
| 11       | CGCTCAACAGAGAATACAAAGAG |
| 12       | GAGCCATCCCGTGAAATGCAG   |

**Figure S1.** IC<sub>50</sub> determinations of resistant *T. brucei* after recovery from mice. Dose response curves comparing **1433**-resistant strains (C1.1 M2 & C3.3 M3) and wildtype (WT) strains (C1.3 M1 & C1.3 M2) passed through mice two times to the *in vitro* parent strains (**1433** C1, **1433** C3, & WT C1).

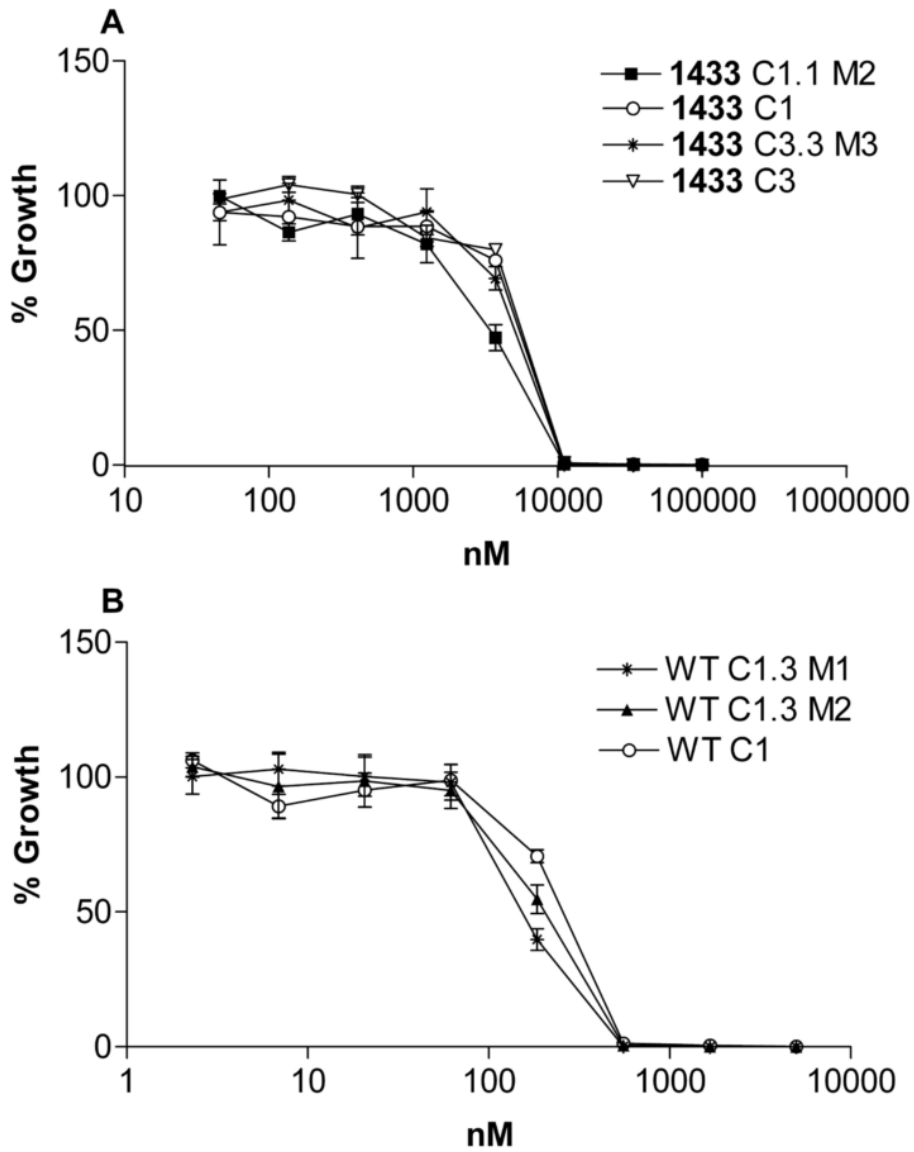

Supplement: AAC.02578-12_zac999101901so1.pdf [file AAC.02578-12_zac999101901so1.pdf]
